# Supplementary material
Source: publisher figshare collection journal article supplement (https://tandf.figshare.com/ndownloader/files/22034526)
Supplement: Supplementary file 1 [file 22034526]

nstates 8 ; 
xread 'Data saved from TNT' 
345 66 
Gracilisuchus_stipanicicorum 000000??0?000000000000?0?000000000?0??0?0?00000?000???0000?0???0?000?100000?00000000?0???0000?0?0000013013?00?0????0?01?01000??1?01???000002002?0???0000????000???00000?0000????000???0????0???????0000?00000?0?000000000?0?0000?00?0?0??0?0??0000?0?00??1?0?0?001???0?1100??1??01000??0???0?0100?0000000?00?0??0?00000??000??????????????????????????000 
Terrestrisuchus_gracilis 000??00??0??000000?000?0?00?000?110?00000?00000?000??0?000?000????00???010??0?000000?010?0000?02000001301??0110??00000?10100??10?00?110?0?0??[01]110???00000???000???00100?000??000?00???0????0??????00????00??0?0??0?0???????????0?????????0?????0?????????????0?00????????????????????????????0??00000000??000??0??00000??00???????0???????????????????000 
Dibothrosuchus_elaphros 000?00?020??001???000000??????00110000000?00000?0000?00000?0?0102000?010100?0010?000?????2000?0?????013011?0110?0?00000101001?10?00?1?000102011100??000001??00?0??0?1000000100000000?000??00?0?00100001000100?0?000000000?000000?0?0000??0??000000?0000?00?0?0?00000?0?1101?01??01000??0??00?000000000000?000?000?00000??100????000???????????????????000 
Protosuchus_richardsoni 2100000120?000011010002100000100010001010?00201001111110010101103011?110210001010100001100[1234]00?120011010012102101010000[01]100000?01??01??10010[012]0101000000???0110000000000000001?00000000?0???0000?0100120000011110??001000?010?0000?0?0000??0?0000000?00000000100000????0??10?????00?000??0000??000000000000?0???000?00000?011?????000???????????????????000 
Hemiprotosuchus_leali ?00?00?10??????10010?0??00?0010?11?0??01??0020?00?11?1100101??1?3?11??1?21????01?????????0????1200?1?1001??0?????????001?000??10?00???00000??10?????00???????0?0??0??00?0??????0?0000?0????0???0???12???001??10?00?00?01??00???0???0?????0?????00???00???00????00????0??10????????0????0??0??????????0?0???0??????????????????????????????????????????000 
Orthosuchus_stormbergi 21100001201?0001001000[01]10000010001000?000?002011001111100??1?1?03011?0?0?0?001000100011100000?120010013022142101?10010?000000001?0101000000?000?0???00001??0000???1010000001?0?000000?0????0??000?012?000011110?0001000?0?000?00?00?0?0??0?000?0?0?0000?000100?00???100110???1?0??0????0?000???????????????01????????????110????000???????????????????000 
Kayenta_Form     [12]01110?1200000?10010?0??00????0?0???11110?002010011111100001011?3011?0102100?1010??0????00??0?12001011001212????0????01000?00?01000111?101001?01?10000000010??01?1?????????1?????00???0????3?00010112??00011??0?010???00?????????000?????0???????0?????0???1???00????1?1???????????????0??????????0000100??0??000?00000????0?????00???????????????????000 
Edentosuchus_tienshanensis 201?????[12]????0??[01]0??1?0100??0?????02?110?00?????????????????????[23]?311????10?01010?????????[234]???????????0???1[23]?????????00010??1?01?1???1000110?11?1????????01??001?1?1?00?????0????00?0?0????3??0?101??1????11??0??1??00000??0???0???0?????0???0???0?00?0??0?1?0?00????101101?11????000??0???0?000000000?0??0????0??000?0??1????1???????????????????????000 
Zaraasuchus_shepardi 10?????????????1?01?01?1000001?10?02????????????????????????????3?????1??010??????????????[1234]0??1010??0???????????0??????????????????????0?????1??1?????????10?????????0000???????0???0?????0?????1?????1?00???0???0???11111111111???????????????????0?????00???????????0?10???????1000??00????0000?????????0??????????0??0?????????????????????????????000 
Gobiosuchus_kielanae 101000?110000011001?[01][01]?1?00001?10?0201000?0020112011111000?0????301???1?20100[01]010?0?1???????0?1010110[01]3013002?0000???0000[01]00001000000?00001001211?0000???11000000001?00000?1?0010000000???00?0?01?0121000011?00?00?0011111111111?000000??000000000?0000?00010??00????001?0??1????10?0??0??????????000000???0??000?00000??20?????0?0???????????????????000 
Sichuanosuchus_shuhanensis [12]01??0?1200[01]00?10010[01]1?110???1?00?021?10?00020?1?011?1100???????3?11????1?000011?1??1?????000????????10?12?0?1???0??100000??1??10?0????0011?[01]1210??00?????1??000??00100?00?10???000?0?00???0?00110?111011111100?1010000100?1???0???0?00??00??0?000???00??001???00????00??0?????0??000??00?1??0??0?000000???000000?00000?011???0??00???????????????????000 
Shantungosuchus_hangjinensis 2?1????1?0???0?1??1????11??????????21?1[01]100020?1?011?1100?10????????101?1?000??10???????0?????????????0?1??????1?????00000??????00??10?00???11211??001??????00000000??0????1???10?00??0????0??????0??1011111??0?1[01]10??0???1??????????????0??????????????????0??0??????????????????????????0??00?0?00?00???00000?0?0???????????1???0???????????????????000 
Zosuchus_davidsoni 201??0?1200000??001010[01]110?001110?02211010012?1??011?11000?0?1?0311110????0?01111????????????????????10?13?3???1?????00000011011?0001?0?0010112?[01]?0001???0?0?0010001[01]000?[01]111????0??0?00???000?1000111??1011?101101000000100???0?000?000?0000000?0?00?0?000100?00????10?10????0???0?0??00???0000000000000?0??00000000000011??01???0???????????????????000 
Fruitachampsa_callisoni 201??001200100010000100100000110010221?11?0120112?1???0?0??0??1?3?31?????1?0111101011?1?00011112?0??1?0??[12]00??1?1001?000?0?0100100??101?0012?01110??0??00?10?????001?00?0????000?0000?0????0????110???000????101??0?00000?000??0??00???0??00?????0???????0?100?00????00110?????????001000??1?00000000000??000?0000000?000111?11?0?0???????????????????000 
Rhabdognathus    202??????200??11100010011011010011012110100[01]01112011?1011010?1?11?302?????????0?????????????????????????1?10??00???????000?????00??000??0[01]10020?001?00?????1?????0?01[01]22000?0??0?000000????0??00?1010010??01?1000001?0000??????0???000???112?1???010??00000000?11?????0000111?0???0000000??1?0?0?000000?1?01?0002000?000011??01??00???????????????????000 
Sokotosuchus_ianwilsoni 2?2??21112??10????001001???101001?012?1??????1112?11?1?11??0???1?1?0?????????01??????????????????????????2?0???????????0???????0????????0?10????????0??????????????0?????????????1?????????0????????0??????????????1???????????0???????????2??000?????0??001?0?11???????????????????????????????????0000?????????????????1?0??????????????????????????000 
Dyrosaurus       202?12?102?010?11??010011??101001?012?101000?1112011?1011?10?101113021???00?2?000??????????00???????????1?10??00???????00??????00???00??0010020?0???0??????1000?00001?0200?????0?0?00?0????00000010?0??000?1??00?001??000000???0?0?0??00?11201000010??000000?0??1????0010011100???00000?0???????000000001?0110002000?000010??11??00???????????????????001 
Hyposaurus_rogersii ?02?12?102??1???????1????0?101??????2????????1?12011?101??10?1?1??3?????0???2?000??112?????00??????????01??0???0???1?0100???????????????0?1002??0???00???1?1000100?0????00???0?0??????0?000000?00???0?????????0???01?????0?????0???????????2?????0?????0???0????1????00??0?1??????000??00??10000????00001?00?0?0?000??0?011???????????????????????????001 
Pholidosaurus_purbeckensis 202?121102??1??1100?10011??0010001012110100?01110?11?101??10?100?131[12]???0???2?0????1?2???0??0??200?????????0??0????????0?0??1?110?????0?00100???????00??????000?0000102?100????0?0000?0???000?00?10?0?10??01?110?0010???0??????0???0???0?10??1????1???0?0001?0?00???????00??????????0?????????????????????0????0??00?0010110??????0???????????????????111 
Sarcosuchus_imperator 203?12?10200101?100010011001010001012?10100101?10?1??10100?0?100?131213??000210101?112????[01]00?1200?00??011[01]0??00[01]001?0?001??121100??00000010010?1???00???110?0[012]11010[01]022[01]00?0000?000000?000000?00?01001000?1?120?0010?00000000?0?0100000?100011110100?0?000100?10????00110?1100?0?0001000??1?00000000000??011000?00000000110001?000???????????????????111 
Terminonaris_robusta 202?[01]2?1020010?11??01001???1010001012?101001??????11?1010??0??0??13[01][12]13?000?2100011112??00000?1200?10??0?110210?1001001001??1??10??0??0?0010????1???000011100?0???101[01]2[12]10?????0?0000?0?0000?0001?0?00?0?0?11120?00?0??00???00?0?0100?00?1020111101?0?0?00?100??00???00?10111?00010000000001?0100?000000??000000[12]00000110100011??01???????????????????111 
Elosuchus_cherifiensis 203?12111100001?1??010????11????01012???????????????????0??????????1????????112?????????????????0????????0????0??????0???1???010?????????????0?11???????????????0?1??02?0????????1????1???????????????????????2???????????????????0????????2??001??????????1?????????0?100?1100??10000100??1?00000000000??00?000200000?10100011?001???????????????????111 
Meridiosaurus_vallisparadisi 2?2?121111??11???????????????????????????????????????????????????1???????????12??????????????????????????010???????????1??0?11????????0?0010?????????????????????010???????????0?1????11???0??????????????????2??????????????????00???0????20?001??????????1?????????????0???0?????????????1?????0??00????0??????0000?0????0????0?0???????????????????111 
Oceanosuchus_boecensis 202?12110100101????11001???101??01012???????????????????0??????????1????????1?00???1?????????????????????0????0??????0???1???110????????????????????????????????0?1??0???????????0????0???????????????????????????????????????????0????????2??001??????????1?????0????0100?0?0??0?000??00??1??0000??00??0?0??????000000101000???0?1???????????????????111 
Vectisuchus_leptognathus 202?????????????00?1?0111110011?0?002110?001?1?????1????00?0??????[23]0214000001?0?????????0?[234]00?1200?10??00?0021?01???101001??1???00???0?0001202101???00???010?0?11??0?022?0?????0??000???0?00???0010??01000?1111??000??0000010?10?????0?0??00?????0?00?0??001?0?10?????00????1????10000000????0000?00?00?1?0??0000?00?0??0?????????????????????????????111 
Paluxysuchus_newmani 203???11?20010110100100111010100010021????0?1111201111010000?1?0??31?1?1?010??200???????????????????????0?00??00?????01100??101100?00000001001101?1?00????0??00110?01022100?0??0?1000111???0?0?00?0100100001?100000100000000???0???000?00?00?1???0000?00000100?00?????0000101?????0000000??1?00000??00??0?00?0?00000?001011???????0???????????????????111 
Goniopholis_simus 203?1211120010111000100111?0010001002?101000?1110011?1010?10?1?021312?4100[01]0[12]02011?1??1??0?00?1200?11?300100210010?1101001??101100?000010010001?1???00001110003110001022100?10?001000111??0000000101001000011110?001000000000000?0000000?10000[01]000000?0?000100?00??????000?????????20100??01?000??000?????0??00?00000001?11??01???0???????????????????111 
Goniopholis_stovalli 203?121111??101?1000100111?0010001001?1??000?1110011?10?0??0?1?021312?410????02????????????????????????00200??00???????001??1?1100??000?0010001?1???00?????0?????0001022?00????0?1??0?11??00??00?10?0??0??01?1100001000000?????0?0000000?1?00000000???0?000100?00?????0?0010?100??000?00010??0000???00001?0??00?0000000?0?????????????????????????????111 
Amphicotylus_lucasii 203?121111??101?1000100111?0010001001?1??000?1110011?10?0??0?1?021312?410????02????????????????????????00100??00???????001??1?1100??000?0010001?1???00?????0?????0001022?00????0?1??0?11??00??00?10?0??0??01?1100001000000?????0?0000000?1?00000000???0?000100?00?????0?0010?120??020?000101?00000??00?00001?00?000000010110??1?000???????????????????111 
Calsoyasuchus_valliceps 203?0201110?10?110?01021111001000?001?1???00?1110?11??0?0??0?1?0?111[12]????????01??????????????????????0??0100??00????????01??11110?0???0?0010001?1???00????????????001022?001?????1????01???0??00?????????????1100?0100000??????000000000???000000??0?100?0?100?00?????0?1010??0??1000???0??0?0?0?0??0??00?0??0???00000??000?????0?0???????????????????111 
Sunosuchus_junggarensis 203?0201111?10?1100010011110010001002110100011110011110100?0?11011312?41000110201??1111?0?20001200?11????????????????????????????????????????????????????????????????????????????????????????????????????????????????????????????????????????????????????????????1????0??011???00?00?1000??1?0000000?000??01??????00000?0200?01??00???????????????????111 
Eutretauranosuchus_delfsi 203??????10010111000100111?00?0001001110?000?1110011?1010??0?1?0?121204?00001020111???1??0??0?1???????3??100??00?????0?001????110???????0??00???1???0????11???[012]?1??01022100?1????10?0??1???00000010?0??000?1?110??01?0000000???0?000?00??100?0?000?00?0??00100?00??0?1010010??0???0001000?0??000?00000001?01000?00000000011???1??00???????????????????111 
Eutretauranosuchus_amnh 203??????100??1110?01001111001000100111010000?11001111010010?110??312??????????0??????????????12????????0?00??00???????001?????10???00?1??100011100?00????0??????0?01022100????0???001?1???0??????01?010???1?111?00???0?00??00?0???0000001?0?0????????0000?100?00????0?0?00???2???02?0??0??1?0?0???000??0?0?????00000000011???1???0???????????????????111 
Goniopholis_baryglyphaeus 20??1????10010111000?0?11110010?0??02?101??001110??????10??0???0?131??4??01?102??????????0?0001200?11??00??0???0???????0??0?1011??????0?00100???????00????????31?00010?2?0??1????1?????1?????????10??????0????10???10??????????????????????000?000??????000?????0??????????????????????????????00??000?0??0??000?0000000?10???1???????????????????????111 
Alligatorium     ?0??????1?0000?1000010?111??0?100?1????0??00??11??1??1000???????20?1????00101?101?011211000???1?00100???????????10??1???????????????????0??????????????????????1???????????????????????????0????????????????????????0??????????????????????????0???????????1???00?????????????????????????0???????????????0????0??0000???10???????????????????????????000 
Theriosuchus_pusillus 201101111201001100001101111001100110211010001?11?01111000?????1?20211?41001010201101121100011[12]1200100130?1002?0?10?110100[01]001?1100?00?0?00120??01??0?00??10[01]00210100[01]02200?100?0?10001110[01]?0??0?0101?0100001?100000?00000?20???000?00000?100?0000000??000??100?00??0?0?0011?1??0?10000000001?0000?0000000?00?0000?000110011??01??00???????????????????000 
Theriosuchus_sympiestodon 2?1????1?2?????????01101????????0110?1101001????0????????0?0??????311?????????1???????????????????????????00???????????0?0??????????????00?????????????????????????0???2??????????0???01???0?????1?1?0?0???1??00????0???0??????0?????????1?0?????0?????00001??????????0??0?????????0????0?????????0000?0??0??????00??0100?????1??0????????????????????000 
Theriosuchus_guimarotae 201101?1121?00??01?011?11??????10?00??101???1????????1?00???????202110???00??1101??1?????0100?120???01???100??0?10?1?0?100001???00????000?12?00??0????010??????1?1011022?011?0?0??0???11???0??0??10??01000?1??00????00?00??????0????1??0??00?0?00???0?0????1?0?00?1010?0????1???01000?000?????????????????0???00??000?1?0?????1??0????????????????????000 
Wannchampsus_kirpachi 203?0???121?001100001111110001000110211010011111201111000000?1?0??310??100111?211??????????11?????????300?0021001???101100????1100?000?00?100010001?00???100?13101?0?022011?00?0?1000110001000?001010010?00101000001??000020???0???000?00100?0???000??00000100?00??1?20001?00?????0001000??11000010000001?0100000?00?1??010??11??00???????????????????000 
Paralligator_major 213??[12]1102??00????0011?1???0010001002?101?01?1?????1?10000?0?1?0??312?????????2??1?????????????1????????0[12]00???0???????001??111100?0000?0010?????????????????????00010?2??1????0?1?00?11???0?????101???0???1?1000???0??2????0??0??00?000?100??00000???0?000100??0?????00????0?????1??11?0?11?0?1?0000000000?????000000110????01?100???????????????????000 
Shamosuchus_djadochtaensis 203????10?1??0111000110111000100011021101?0011110?1111000000?110??310?4100101?1???????1101[34]11[01][13]1?0?10?[03]00[123]002?00[01]????01000??1?11?0?0000000100011101?00000??0?0?10?000021[01]?0?1??0?1000?100000?0?001010010?001?10?0001000200200?10???000?0?100?0??00?00?000001?0?0001?1?0?01101??00011111011?1?001000000001?01000?0000001?110??01??00???????????????????000 
Paralligator_gradilifrons 20301[12]11020000??1000110111?001000110211010011111001111000000?110?0312?1100101020?????21???[234]000[13]1???10?000100??00[01]0???0100101111100?0000000100010101000???010000001001021?11?10?0?1000?1100000000010100100001110000010?0200200?10?0?00000?100000000?00?00000100?00??1?100010001?0001101111?110001?00000001000?000000000111110001?100???????????????????000 
Rugosuchus_nonganensis 203??[12]?1?20?00??1??0110111????00011[01]2110?000?1110?11?1000000?1?0??31??4?0010102???????????????21[12]0??0?[03]0?100???0?????01?01??1?1000?0?00??0100?1?1???00???100?0?1?100??2???0?10???10???110000?0?0????0?100001?100?0010?000020???0?0?00000?1?0??0000000?00000100?01????0??????????????1111???1?0000??000001?0?0000000000?0011??0???00???????????????????000 
Glen_Rose_Form 2030001112??0011???0100111?001100???2110?001??11??11?10?00?0?1?030310????01?10211?????????????????????3??100??00?????01000?0131?00?0000??010?0???01??????10??13101001022??1?10?0?10?0?1000?000??01?1?010?0?1?1000???000?0?2????0?000000001000000000?0?00?00100?00????200011001???101?1000??1?00001000000??00?0???0000?110100011-1?0???????????????????000
Batrachomimus_pastosbonensis 2030???1021?00??100010?11100010?????21101000011?0????????????????03?2?410?10102??????????????????????????100??0??????01001?11?1000???0000012101?10??0??????0?0???00000110??????0?100??110000??1??1??001000?1?100?00?0002?000???01??000?0?100?00000100?0????1???00???????????1?0??1101110???1?0000?0000?0?00?0?0000000?00?00??01??00???????????????????000 
Hylaeochampsa_vectiana 00???????21???11????1?01???0????0?002?1?1012????0????101??1??1????310??????????????????????????????????????????0???????00????????????0??0??????0???????????????????00022?01???????00?1?????0???????????????????????????????????0???????0?1???0???????????00??0????????001110???????0000?0??1?0?0?000????0?0??1101111?0?0000???11?10???????????????????000 
Iharkutosuchus_makadii 203?1211021?0011?10010?101?001?0?1002110101201110011?1010010?110013?0????01?0?1???????????????????????0?0100??10?????000000?14100??0000101100000000000???10??011?1000002001????0?0000?0??1?20??0010000100011?10000000?000000?????0000000?10000000000??0000010??00????2?0?00011????0000010??10000??0000101?0101111110000000021?11010???????????????????000 
Acynodon_iberoccitanus 203?021102??00?210?0100111?0010001002110?012?1110011?10100?0?1?001310?3??11?10200?????????????????????3?1100??00?????0?1000?14110??00000?010101?1???00???????00?1?001021?00?0?00?0?00?0????000?0?1010?1000?1?100?0010?000?00???0?0000000?100?1000010??0?000100?00????0?0?0?0?0????01?1100??1?00??00000?01?01?1111100000001110?10010???????????????????000 
Acynodon_adriaticus 203?02?1020000??10?01001110011000?0021101012?11?0?1??1???0???1?001310?3?011?0000?2?????????1??2110??0?301100??0??????010000?141?0???00000012111?1???00??000??0???000002110?????0?0000?0??000???0?1[01]10?1000?1110?000?0?00000?0??0?0?0?0000100?00000????000001?0?0????????00?11???010001000?0??00???0000?0??01?1111?1100000110??11?10???????????????????000 
Allodaposuchus_precedens 203??2?11?0?????1?0?10[01]1111001000?00?11???1???110?11?1??00?0?1?0?131??????????2????????????11???????????0??0???0???????001???????0??00?000100?1?1?1?00????????????00?022?01??????1?00??????0???0??010?1???0??10??001??0000?????0?0???000?1?[01]0?000??0??00000??0?0??????0000101???????0??????????????0?0000?01?00010000000?1110?1?100???????????????????000 
Agaresuchus_subjuniperus 203?1211120000??0000101111?0110?0??0211010120?110011010000?0?11?01?10????????02?????????????????????????0200??00?0?????00101131100??0000001000101?1000???????????0001??110??1??0?1000?11???0???0?1010010???1?1000?010?1000?????0?0000000?1?0?1000000??0000?100?10??????00000?1?????2011??????0?0?000?0?00?0??0?000000?00?1111?1?100???????????????????000 
Lohuecosuchus_mechinorum 203?1211120000??1100101111?001000?0021101?12?1110?11?1??00?0?1?001310????????02?????????????????????????0200??00???????00101131100??00000010111?1???00????????????001022?01?1??0?1000?11???0???0?1010010???1?10000010?0000?????0?00000?0010001000000??00000100?00?????00000011????02010?0??100???00000?00?0??0001000000001111?10?00???????????????????000 
Susisuchus_anatoceps 203?12?10?1?00?11000100111?001000100??????1??11?2????????????1?0?131??3?0????00??1?????????0002020110????100?10??00?1??000??1?11?0????000012011?0???00???????0????0?1022?01?0???10??0?0????0????0???0?1?00??110??00?0?0000000000?0?0000????0000000?0??0?00?1?0000?????0?11?0????01000??00?0?00?0????0000?1?????0??00100?0112??????????????????????????000 
Isisfordia_duncani 203?120102000011100010011110010001002110100111112011?1010010?1?101312?310001000001?1??????1000[12]010000?010100?1001?00?0?0010?131100?0??000012101?1?1000010?0?000000000022101?1??0?00?000???00?00001?110100011110000010?00000000?0?0000000?100?00000000?000001000001????011000?20??100?11000010000?00000001100?000000010010112??1??01???????????????????000 
Borealosuchus_formidabilis 203?1211120010111000100111?001000100211010111111211111010010?110?13100310001102011111211113111?110?10?300100210?100100?001??11110??000000010001?1???0000110000310?00?022101??????1000[12]11??0000?001010010000111000001000000000000?000???0?100??000000??00?001000000?0100010?111?00?0000000001?000000000001101?00??000000101000?10000???????????????????000 
Argochampsa_krebsi 202?121112001011???110[01]101?0010001012110?012??112?11?10110?0?1?0?1300????????00?????????????????????????0100??00???????001??111100??000??010?0[12]0?0??00???????????0001022?01?1??0?00?020????0???0???1?010?????1000??10?0?0??????0?0?00000?0??000?0010??0?000100??1???????1001?0????0000??0??100?0?0??0??00?0??000000?000101100?1?000???????????????????000 
Pristichampsus_vorax 200?02?112000011100010111100010001002110??1211112011?10100?0?1?1?1310?3???0?102011?112??0?311?1?????1?3?0100??001??1??1101??1?1100?0000000120010100?000??[01]0??0300100002??01?1000?[01]001?1?00?000?001010010???111000001000000??0??0?0000000?10000000000??00000100?000011000111111????000???00?1?000??0000000?01?00??000000101110?10000???????????????????000 
Eothoracosaurus_mississippiensi [12]02?1211120010??11?[01]100111?0010001002110??1?011?2??1?1?11????1?0?131??3100??20000?????????[1234]111[12]1????1?3001002?0?1?0??01?01??121100?0000?00100?1?????00????0000010?001022101??????0000???000000?00101?0?000?1?10000010??000?00??0?0000?00??00010000100???000100?00????01010?110????0000000??1?000000000000?00000?0000000100010?10000???????????????????000 
Gavialis_gangeticus 212?1211020011111101101111100100010021101012011120111101101011100131003100012000001112110131112111100?300100210?10010[01]?001??121100?00000001000101?1?00001?00000100001022101?1?0000000[12]1??00000?001010010000111000001?00000000000?000??00?100010000[12]00?000001000101110010110110?0010000010001000000000000?10110000000000101000?10001???????????????????000 
Leidyosuchus_canadensis 203112111200[01]01110001001111001000?0021101012?1112111110100?0?1?0?1310031000110201?????????????20???10?300100??00?????01001??111100?00000001000101?1?00???1[01]???31?1001022100?1000?1000211??0000?0010100100001?10000010?000000???0?0000000?100000000000?00000100?00???1001101111????00010?0??1?000000000001?0010000000000101011?10000???????????????????000 
Asiatosuchus_germanicus 203?1211120000111000101111?0010001002?10?012111?2?1??1??0????1?0?131003?000110?012?1?21??1?11?????????300100?10????1101001??1[12]1100????00001000101???000??10000?10?001022?01?1????10?0?11000000?0?1?1001000?11100?0010?0000?0???0?0000000?1?000000?000?0?000100?00101100010?111?0??000?000001?00000???000??0??000000000??0101??1??0????????????????????000 
Crocodylus_niloticus 203012111200[01]011100010211110010001002110?012111120111101001011100131003100010020121112110131112021100?3001002100100100?001??121100?0000000100010101?00001?0000310?001022101?100011000211??00000001010010000111000001000000000000?0000000?100000000?00?000001000001011000101111?0010000000001?00000000000010100000000000101000?10000???????????????????000 
Diplocynodon_hantonensis 203?1211120010111000101111?0010001002110?01211112011110100?0?110?131003100010020111112110131112021110?3001002?001??1?01001??111[01]00??0000001000101?1?0000110000310?001022001?10?0?1000?11?00000?00101001000?11100?0010?00000000?0?0000000?100?00??0000?00000100?000011001101111?0010001100001?00000??0000010??0000000000101010?10000???????????????????000 
Alligator_mississippiensis 203112?102?0001110001021111001000?0021101012111120111101001011100031203100010020121112111131112021100?30010021001001001001??111000?00000001000[12]0101?000011?0003101001022000?100011000211??00000001010010000111000001000000000000?0000000?100000000000?00000100000001110111111100010001100001?000000000001101?0000000000100010?10000???????????????????000 
Koumpiodontosuchus 
2	0	3	1	?	1	?	1	1	2	0	0	1	0	?	?	1	?	?	0	0	0	0	1	1	?	?	?	?	?	0	0	0	1	0	0	2	1	1	0	1	?	1	1	1	?	?	1	0	?	0	?	?	?	?	?	0	0	?	1	?	1	?	0	0	1	3	1	0	?	?	1	0	0	1	?	1	0	2	1	0	?	?	?	?	?	?	?	?	?	?	?	?	?	?	?	?	?	?	?	?	?	3	?	0	?	0	0	?	?	1	0	?	?	?	?	?	0	1	0	0	1	0	1	1	?	0	2	0	1	?	?	?	0	?	?	0	?	1	2	0	?	1	?	1	0	?	?	?	?	?	?	?	1	0	?	?	0	3	1	0	1	0	0	0	0	2	1	1	?	0	?	?	?	?	0	?	1	0	?	1	?	1	1	1	0	?	0	?	0	?	?	0	?	?	?	0	0	1	0	?	?	?	1	?	0	0	0	?	0	0	1	0	?	?	0	0	0	?	?	?	?	0	0	?	0	?	0	0	?	0	0	0	1	1	0	0	0	?	?	0	0	0	0	0	?	0	?	0	0	0	1	?	0	?	0	0	?	?	?	?	0	0	?	1	1	?	0	0	?	?	?	?	?	0	0	0	0	0	?	0	?	?	1	0	?	0	0	0	?	0	0	0	0	0	0	1	?	1	?	?	?	0	0	?	?	1	0	0	0	0	?	0	1	0	?	?	1	0	?	?	?	?	?	?	?	?	?	?	?	?	?	?	?	?	?	?	?	?	?	?	?	?	1	0
Bernissartia_CTScan 
2	0	3	1	1	1	1	1	1	2	0	0	0	0	1	?	1	0	?	0	1	0	0	1	1	1	1	0	1	1	0	1	0	1	0	0	2	1	1	0	1	?	0	1	1	0	1	1	0	?	0	1	?	1	?	1	?	?	1	1	?	1	?	0	0	1	3	1	?	?	3	1	0	0	1	0	1	0	2	0	0	?	?	?	1	?	0	?	?	?	?	0	0	0	2	1	1	0	0	1	0	?	3	0	?	1	0	0	?	?	0	?	?	?	0	?	?	0	1	0	0	1	0	0	0	?	0	2	0	1	?	?	0	0	0	0	0	?	1	2	0	?	1	?	1	0	?	?	0	1	?	?	?	1	0	0	0	0	3	1	0	1	0	0	0	0	2	2	?	0	0	?	?	0	0	0	0	1	0	0	1	2	1	1	1	0	0	0	0	0	?	0	0	0	0	0	0	0	1	0	0	0	?	1	?	0	0	?	?	0	0	1	0	?	?	0	0	0	0	0	0	0	0	0	?	0	0	0	0	0	0	0	0	?	1	0	0	0	0	0	0	0	?	?	0	?	1	?	0	0	0	1	?	0	0	0	0	?	?	?	?	0	0	1	0	1	1	0	0	0	?	1	?	1	0	0	0	0	?	0	0	0	?	1	0	?	0	0	0	0	0	0	0	0	0	0	?	?	1	1	1	0	0	0	1	0	1	0	0	0	0	?	0	1	1	1	0	1	?	0	0	?	?	?	?	?	?	?	?	?	?	?	?	?	?	?	?	?	?	?	?	?	0	1	0
; 

Ccode  
   +[/1  0        -[/1  1        +[/1  2        -[/1  3        -[/1  4      
   +[/1  5        -[/1  6        -[/1  7        -[/1  8        +[/1  9      
   -[/1  10       -[/1  11       -[/1  12       -[/1  13       -[/1  14     
   -[/1  15       -[/1  16       -[/1  17       -[/1  18       -[/1  19     
   -[/1  20       -[/1  21       +[/1  22       -[/1  23       -[/1  24     
   -[/1  25       -[/1  26       -[/1  27       -[/1  28       -[/1  29     
   -[/1  30       -[/1  31       -[/1  32       -[/1  33       -[/1  34     
   -[/1  35       +[/1  36       -[/1  37       -[/1  38       -[/1  39     
   -[/1  40       -[/1  41       +[/1  42       +[/1  43       +[/1  44     
   -[/1  45       -[/1  46       -[/1  47       +[/1  48       -[/1  49     
   -[/1  50       -[/1  51       -[/1  52       -[/1  53       -[/1  54     
   -[/1  55       -[/1  56       -[/1  57       -[/1  58       -[/1  59     
   -[/1  60       -[/1  61       -[/1  62       -[/1  63       +[/1  64     
   -[/1  65       +[/1  66       -[/1  67       +[/1  68       -[/1  69     
   -[/1  70       -[/1  71       +[/1  72       -[/1  73       -[/1  74     
   -[/1  75       +[/1  76       -[/1  77       +[/1  78       -[/1  79     
   -[/1  80       -[/1  81       -[/1  82       -[/1  83       -[/1  84     
   +[/1  85       -[/1  86       -[/1  87       -[/1  88       +[/1  89     
   +[/1  90       -[/1  91       -[/1  92       -[/1  93       -[/1  94     
   +[/1  95       +[/1  96       -[/1  97       -[/1  98       -[/1  99     
   -[/1  100      -[/1  101      -[/1  102      +[/1  103      +[/1  104    
   +[/1  105      -[/1  106      +[/1  107      -[/1  108      -[/1  109    
   -[/1  110      -[/1  111      -[/1  112      -[/1  113      -[/1  114    
   -[/1  115      -[/1  116      -[/1  117      -[/1  118      -[/1  119    
   -[/1  120      -[/1  121      -[/1  122      -[/1  123      -[/1  124    
   +[/1  125      -[/1  126      -[/1  127      -[/1  128      -[/1  129    
   -[/1  130      -[/1  131      -[/1  132      -[/1  133      -[/1  134    
   -[/1  135      -[/1  136      -[/1  137      -[/1  138      +[/1  139    
   -[/1  140      +[/1  141      +[/1  142      -[/1  143      -[/1  144    
   -[/1  145      -[/1  146      -[/1  147      +[/1  148      -[/1  149    
   -[/1  150      -[/1  151      -[/1  152      -[/1  153      -[/1  154    
   -[/1  155      -[/1  156      -[/1  157      -[/1  158      -[/1  159    
   -[/1  160      -[/1  161      -[/1  162      -[/1  163      -[/1  164    
   -[/1  165      +[/1  166      -[/1  167      -[/1  168      -[/1  169    
   -[/1  170      -[/1  171      -[/1  172      -[/1  173      -[/1  174    
   -[/1  175      -[/1  176      -[/1  177      -[/1  178      -[/1  179    
   -[/1  180      +[/1  181      -[/1  182      -[/1  183      -[/1  184    
   -[/1  185      -[/1  186      -[/1  187      -[/1  188      -[/1  189    
   -[/1  190      -[/1  191      -[/1  192      -[/1  193      -[/1  194    
   -[/1  195      +[/1  196      -[/1  197      -[/1  198      -[/1  199    
   -[/1  200      -[/1  201      -[/1  202      -[/1  203      -[/1  204    
   -[/1  205      -[/1  206      -[/1  207      -[/1  208      -[/1  209    
   -[/1  210      -[/1  211      -[/1  212      -[/1  213      -[/1  214    
   -[/1  215      -[/1  216      -[/1  217      -[/1  218      -[/1  219    
   -[/1  220      -[/1  221      -[/1  222      -[/1  223      -[/1  224    
   +[/1  225      -[/1  226      -[/1  227      -[/1  228      -[/1  229    
   -[/1  230      -[/1  231      -[/1  232      -[/1  233      -[/1  234    
   -[/1  235      -[/1  236      -[/1  237      -[/1  238      -[/1  239    
   -[/1  240      -[/1  241      -[/1  242      -[/1  243      -[/1  244    
   -[/1  245      -[/1  246      -[/1  247      -[/1  248      -[/1  249    
   -[/1  250      -[/1  251      -[/1  252      -[/1  253      -[/1  254    
   -[/1  255      -[/1  256      -[/1  257      -[/1  258      -[/1  259    
   -[/1  260      -[/1  261      -[/1  262      -[/1  263      -[/1  264    
   -[/1  265      -[/1  266      -[/1  267      -[/1  268      -[/1  269    
   -[/1  270      -[/1  271      -[/1  272      -[/1  273      -[/1  274    
   -[/1  275      -[/1  276      -[/1  277      -[/1  278      -[/1  279    
   -[/1  280      -[/1  281      -[/1  282      -[/1  283      -[/1  284    
   -[/1  285      -[/1  286      -[/1  287      -[/1  288      -[/1  289    
   -[/1  290      -[/1  291      +[/1  292      -[/1  293      -[/1  294    
   -[/1  295      -[/1  296      -[/1  297      -[/1  298      -[/1  299    
   -[/1  300      -[/1  301      -[/1  302      -[/1  303      -[/1  304    
   -[/1  305      -[/1  306      -[/1  307      -[/1  308      -[/1  309    
   -[/1  310      -[/1  311      -[/1  312      -[/1  313      -[/1  314    
   -[/1  315      -[/1  316      -[/1  317      -[/1  318      -[/1  319    
   -[/1  320      -[/1  321      -[/1  322      -[/1  323      -[/1  324    
   -[/1  325      -[/1  326      -[/1  327      -[/1  328      -[/1  329    
   -[/1  330      -[/1  331      -[/1  332      -[/1  333      -[/1  334    
   -[/1  335      -[/1  336      -[/1  337      -[/1  338      -[/1  339    
   -[/1  340      -[/1  341      -[/1  342      -[/1  343      -[/1  344    
; 
cnames 
{0 External_surface_of_dorsal_cranial_bones smooth slightly_grooved heavily_ornamented_with_deep_pits_and_grooves; 
{1 Skull_expansion_at_orbits gradual abrupt; 
{2 Rostrum_proportions_ narrow_oreinirostral broad_oreinirostral nearly_tubular playtrostral; 
{3 Premaxilla_participation_in_internarial_bar_ forming_at_least_the_ventral_half with_little_participation; 
{4 Premaxilla_anterior_to_nares_ narrow broad; 
{5 External_nares_orientation_ facing_anterolaterally dorsally_not_separated_by_premaxillary_bar_from_anterior_edge_of_rostrum dorsally_separated_by_premaxillary_bar; 
{6 Palatal_parts_of_premaxillae_extent_of_contact_ do_not_meet_posterior_to_incisive_foramen meet_posteriorly_along_contact_with_maxillae; 
{7 Premaxilla_maxilla_contact_nature_of_contact_ premaxilla_loosely_overlies_maxilla_i.e._posterodorsal_process_of_the_premaxilla_overlaps_the_anterodorsal_surface_of_the_maxilla_ sutured_together_along_a_butt_joint; 
{8 Ventrally_opened_space_on_ventral_edge_of_rostrum_at_premaxilla_maxilla_contact_ absent present_as_a_notch present_as_a_large_fenestra; 
{9 Posterior_palatal_branches_of_maxillae_anterior_to_palatines_nature_of_contact_ do_not_meet meet_extensively_but_posterior_most_parts_do_not_meet meet_entirely; 
{10 Nasal_lacrimal_contact_ present absent; 
{11 Lacrimal_contact_with_nasal_location_of_contact_ only_along_medial_edge_of_nasal along_medial_and_anterior_edges_of_nasal; 
{12 Nasal_contribution_to_narial_border_ present absent; 
{13 Nasal_premaxilla_contact_ present absent; 
{14 Descending_process_of_prefrontal_contact_with_palate_ does_not_contact_palate contacts_palate; 
{15 Postorbital_jugal_contact_configuration_of_contact_ postorbital_anterior_to_jugal postorbital_medial_to_jugal postorbital_lateral_to_jugal; 
{16 Dorsoventral_size_of_anterior_part_of_jugal_with_respect_to_posterior_part_ as_broad twice_as_broad; 
{17 Jugal_bar_beneath_infratemporal_fenestra_shape_ flattened rod_shaped; 
{18 Quadratojugal_dorsal_process_width_and_contact_with_postorbital_ narrow_contacting_only_a_small_part_of_the_postorbital broad_extensively_contacting_postorbtial; 
{19 Frontal_width_between_orbits_ narrow_as_broad_as_nasals broad_twice_as_broad_as_nasals; 
{20 Frontals_ paired unpaired; 
{21 Dorsal_surface_of_frontal_and_parietal_ flat with_midline_ridge; 
{22 Parietao_postorbital_suture_ absent_from_dorsal_surface_of_skull_roof_and_supratemporal_fossa absent_from_dorsal_surface_of_skull_roof_but_broadly_present_with_supratemporal_fossa present_within_supratemporal_fossa_and_on_dorsal_surface_of_skull_roof; 
{23 Supratemporal_roof_conformation_of_dorsal_surface_ complex dorsally_flat_skull_table_developed_with_postorbital_and_squamosal_with_flat_shelves_extending_laterally_beyond_quadrate_contact; 
{24 Postorbital_bar_external_texture_ sculpted_if_skull_is_sculpted_ unsculpted; 
{25 Postorbital_bar_shape_ transversely_flattened cylindrical; 
{26 Vascular_opening_in_dorsal_surface_of_postorbital_bar_ absent present; 
{27 Postorbital_anterolateral_process_ absent_or_poorly_developed well_developed_long_and_acute; 
{28 Dorsal_part_of_postorbital_shape_in_dorsal_view_ with_anterior_and_lateral_edges_only with_anterolaterally_facings_edge; 
{29 Dorsal_end_of_the_postorbital_bar_shape_nearing_skull_table_ broadens_dorsally_continuous_with_dorsal_part_of_postorbital dorsal_part_of_the_postorbital_bar_constricted_distinct_from_the_dorsal_part_of_the_postorbital; 
{30 Bar_between_orbit_and_supratemporal_fossa_shape_ broad_and_solid_with_broadly_sculpted_dorsal_surface_if_sculpture_is_present_on_skull bar_narrow_sculpting_restricted_to_anterior_surface; 
{31 Parietal_occipital_portion_ with_broad_occipital_portion without_broad_occipital_portion; 
{32 Parietal_ with_broad_sculpted_region_separating_fossae with_sagittal_crest_between_supratemporal_fossae; 
{33 Postparietal_dermosupraoccipital_ a_distinct_element not_distinct_fused_with_parietal_; 
{34 Posterodorsal_corner_of_the_squamosal_shape_ squared_off_lacking_extra_lobe_ with_unsculpted_lobe_; 
{35 Posterodorsal_process_of_squamosal_shape_ poorly_developed_and_projected_horizontally_at_the_same_level_of_the_skull elongated_thin_and_posteriorly_directed_not_ventrally_deflected elongated_posterolaterally_directed_and_ventrally_deflected; 
{36 Palatines_extent_of_contact_on_palate_ do_not_meet_on_palate_below_the_narial_passage form_palatal_shelves_that_do_not_meet meet_ventrally_to_the_narial_passage_forming_part_of_secondary_palate; 
{37 Pterygoid_location_ restricted_to_palate_and_suspensorium_joints_with_quadrate_and_basisphenoid_overlapping pterygoid_extends_dorsally_to_contact_laterosphenoid_and_form_ventrolateral_edge_of_teh_trigeminal_foramen_strongly_sutured_to_quadrate_and_laterosphenoid; 
{38 Choanal_opening_conformation_in_palate_ continuous_with_pterygoid_ventral_surface_except_for_anterior_and_anterolateral_borders opens_into_palate_through_a_deep_midline_depression_choanal_groove_; 
{39 Palatal_surface_of_pterygoids_ smooth sculpted; 
{40 Pterygoids_posterior_to_choanae_ separated fused; 
{41 Depression_on_primary_pterygoidean_palate_posterior_to_choana_ absent_or_moderate_in_size_being_narrower_than_palatine_bar; 
{42 Primary_pterygoidean_palate_role_in_forming_choanal_opening_ does_not_enclose_choana completely_encloses_choana; 
{43 Anterior_edge_of_choanae_location_ situated_between_the_suborbital_fenestra_or_anteriorly_ situated_near_the_posterior_edge_of_suborbital_fenestra near_posterior_edge_of_pterygoid_flange; 
{44 Quadrate_fenestration_ without_fenestrae with_single_fenestrae with_three_or_more_fenestrae_on_dorsal_and_posteromedial_surfaces; 
{45 Posterior_edge_of_quadrate broad_medial_to_tympanum_gently_concave posterior_edge_narrow_dorsal_to_otoccipital_contact_strongly_concave; 
{46 Dorsal_primary_head_of_quadrate_articulates_with_ squamosal_otoccipital_and_prootic with_prootic_and_laterosphenoid; 
{47 Ventrolateral_contact_of_otoccipital_with_quadrate_ very_narrow broad; 
{48 Quadrate_squamosal_and_otoccipital_formation_of_cranioquadrate_passage_ do_not_meet_to_enclose_cranioquadrate_passage enclose_passage_near_lateral_edge_of_skull meet_broadly_lateral_to_the_passage; 
{49 Pterygoid_ramus_of_quadrate_ventral_edge_ with_flat_ventral_edge with_deep_groove_along_ventral_edge; 
{50 Ventromedial_part_of_quadrate_contact_with_otoccipital_ does_not_contact_otoccipital contacts_otoccipital_to_enclose_carotid_artery_and_form_passage_for_cranial_nerves_IX_XI; 
{51 Eustachian_tubes_relationship_with_basioccipital_and_basisphenoid_ not_enclosed_between_basioccipital_and_basisphenoid entirely_enclosed; 
{52 Basisphenoid_rostrum_cultriform_process_ slender dorsoventrally_expanded; 
{53 Basipterygoid_process_shape_ prominent_forming_movable_joint_wiht_pterygoid small_or_absent_with_basisphenoid_joint_suturally_closed; 
{54 Basisphenoid_ventral_surface_size_relative_to_basioccipital_ shorter_than_the_basioccipital wide_and_similar_to_or_longer_in_length_than_basioccipital; 
{55 Basisphenoid_exposure_on_braincase_ exposed_on_ventral_surface_of_braincase virtually_excluded_from_ventral_surface_by_pterygoid_and_basioccipital; 
{56 Basioccipital_ without_well_developed_bilateral_tuberosities with_large_penduluous_tubera; 
{57 Otoccipital_ without_laterally_concave_descending_flange_ventral_to_subcapsular_process with_flange; 
{58 Cranial_nerves_IX_XI_passage_through_braincase_ pass_through_common_large_foramen_vagi_in_otoccipital cranial_nerve_IX_passes_medial_to_nerves_X_and_XI_in_separate_passage; 
{59 Otoccipital_ventral_to_paroccipital_process_ without_large_ventrolateral_part with_large_ventrolateral_part; 
{60 Crista_interfenestralis_between_fenestrae_pseudorotunda_and_ovalis_orientation_ nearly_vertical horizontal; 
{61 Supraoccipital_participation_in_foramen_magnum_ forms_dorsal_edge_of_the_foramen_magnum otoccipitals_broadly_meet_dorsal_to_the_foramen_magnum_separating_supraoccipital_from_foramen; 
{62 Mastoid_antrum_location_ does_not_extend_into_supraoccipital extends_through_transverse_canal_in_supraoccipital_to_connect_middle_ear_regions; 
{63 Posterior_surface_of_supraoccipital_ nearly_flat with_bilateral_posterior_prominences; 
{64 Palpebrals_number_ absent one_small_palpebral_present_in_orbit one_large_palpebral two_large_palpebrals; 
{65 External_nares_ divided_by_a_septum confluent; 
{66 Antorbital_fenestra_size_ as_large_as_orbit about_half_the_diameter_of_the_orbit much_smaller_than_the_orbit absent; 
{67 Supratemporal_fenestrae_extension_ relatively_large_covering_most_of_surface_of_skull_roof relatively_short_fenestrae_surrouned_by_a_flat_and_extended_skull_roof; 
{68 Choanal_groove_ undivided partially_septated completely_septated; 
{69 Dentary_relative_to_mandibular_fenestra_ extends_posteriorly_beneath_mandibular_fenestra does_not_extend_beneath_fenestra; 
{70 Retroarticular_process_ absent_or_extremely_reduced very_short_broad_and_robust with_an_extensive_rounded_wide_and_flat_or_slightly_concave_surface_projected_psoteroventrally_and_facing_dorsomedially posteriorly_elongated_triangular_shaped_and_facing_dorsally posteroventrally_projecting_and_paddle_shaped; 
{71 Prearticular_ present absent; 
{72 Articular_medial_process_ without_medial_process with_short_process_not_contacting_braincase with_process_articulation_with_otoccipital_and_basisphenoid; 
{73 Dorsal_edge_of_surangular_ flat arched_dorsally; 
{74 Mandibular_fenestra_ present absent; 
{75 Insertion_area_for_M._pterygoideous_posterior_ does_not_extend_onto_lateral_surface_of_angular extends_onto_lateral_surface_of_angular; 
{76 SPlenial_involvement_in_symphysis_in_ventral_view_ not_involved involved_slightly_in_symphysis extensively_involved; 
{77 Posterior_premaxillary_teeth_size_ similar_in_size_to_anterior_teeth longer_but_does_not_form_an_enlarged_caniniform_tooth; 
{78 Maxillary_teeth_waves_ absent_no_tooth_size_variation one_wave_of_teeth_enlarged enlarged_maxillary_teeth_curved_in_two_waves_festooned_; 
{79 Anterior_dentary_teeth_opposite_premaxilla_maxilla_contact_ no_more_than_twice_the_length_of_other_dentary_teeth more_thant_wice_the_length; 
{80 Dentary_teeth_posterior_to_tooth_opposite_premaxilla_maxilla_contact_ equal_in_size enlarged_dentary_teeth_opposite_to_smaller_teeth_in_maxillary_toothrow; 
{81 Anterior_and_posterior_scapular_edges_ symmetrical_in_lateral_view anteior_edge_more_strongly_concave_than_posterior_edge dorsally_narrow_with_straight_edges; 
{82 Coracoid_length_ up_to_two_thirds_of_the_scapular_length subequal_in_length_to_scapula; 
{83 Anterior_process_of_ilium_length_relative_to_posterior_process_ similar_in_length one_quarter_or_less_of_the_length; 
{84 Pubis_shape_ rodlike_without_expanded_distal_end with_expanded_distal_end; 
{85 Pubis_contribution_to_acetabulum_ forms_anterior_half_of_ventral_edge_of_acetabulum pubis_contacts_the_ilium_but_partially_excluded_from_the_acetabulum_by_the_anterior_process_of_the_ischium pubis_completely_excluded_from_the_acetabulum_by_the_anterior_process_of_the_ischium; 
{86 Distal_end_of_femur_lateral_facet_for_fibula_ large very_small; 
{87 Fifth_pedal_digit_phalanges_ present absent; 
{88 Atlas_intercentrum_size_ broader_than_long as_long_as_broad; 
{89 Cervical_neural_spines_shape_ all_anteroposteriorly_large only_posterior_spines_rodlike all_spines_rodlike; 
{90 Hypapophyses_in_cervicodrsal_vertebrae_ absent present_only_in_cervical_vertebrae present_in_cervical_and_the_first_two_dorsal_vertebrae present_up_to_the_third_dorsal_vertebra present_up_to_the_fourth_dorsal_vertebrae; 
{91 Cervical_vertebrae_ amphicoelous_or_amphyplatian procoelous; 
{92 Trunk_vertebrae_ amphicoelous_or_amphyplatian procoelous; 
{93 All_caudal_vertebrae_ amphicoelous_or_amphyplatian first_caudal_biconvex_with_other_procoelous procoelous; 
{94 Dorsal_osteoderms_shape_ rounded_or_ovate rectangular_broader_than_long square rectangular_longer_than_broad; 
{95 Dorsal_osteoderms_anterior_margin_ without_articular_anterior_process with_a_discrete_convexity_on_anterior_margin with_a_well_developed_process_located_anterolaterally_in_dorsal_parasagittal_osteoderms; 
{96 Rows_of_dorsal_osteoderms_ two_parallel_rows more_than_two more_than_four; 
{97 Osteoderms_contact_with_one_another_ some_or_all_imbricated sutured_to_one_another; 
{98 Tail_osteoderms_ dorsal_only completely_surrounded_by_osteoderms; 
{99 Osteoderms_on_ventral_part_of_trunk_ absent present; 
{100 Osteoderms_longitudinal_keels_on_dorsal_surface_ present absent; 
{101 Jugal_relationship_with_antorbital_fossa_ participates_in_margin_of_antorbital_fossa separated_from_it; 
{102 Mandibular_symphysis_in_lateral_view_ shallow_and_tapering_anteriorly deep_and_tapering_anteriorly deep_and_anteriorly_convex shallow_and_anteriorly_convex; 
{103 Articular_facet_for_quadrate_condyle_size_ equal_in_length_to_the_quadrate_condyles slightly_longer; 
{104 Jaw_joint_location_ placed_at_level_with_basioccipital_condyle below_basioccipital_condyle_about_above_level_of_lower_toothrow below_level_of_toothrow; 
{105 Premaxillary_tooth_number_ six five four three; 
{106 Unsculptured_region_along_alveolar_margin_on_lateral_surface_of_maxilla_ absent present; 
{107 Maxilla_number_of_teeth_ eight_or_more seven six five four; 
{108 Coracoid_posteromedial_or_ventromedial_process_ absent elongate_posteromedial_process_present distally_expanded_ventromedial_process_present; 
{109 Radiale_and_ulnare_size_ short_and_massive elongate; 
{110 Prefrontals_anterior_to_orbits_ elongated_oriented_parallel_to_anteroposterior_axis_of_the_skull short_and_broad_oriented_posteromedially_anterolaterally; 
{111 Basioccipital_and_ventral_part_of_otoccipital_orientation_ facing_posteriorly posteroventrally; 
{112 Vertebral_centra_shape_ cylindrical spool_shaped; 
{113 Transverse_process_of_posterior_dorsal_vertebrae_shape_ dorsoventrally_low_and_laminar dorsoventrally_high; 
{114 Number_of_sacral_vertebrae two; 
{115 Supra_acetabular_crest_ present absent; 
{116 Proximal_end_of_radiale_shape_ expanded_symmetrically_similarly_to_the_distal_end more_expanded_proximolaterally_than_proximomedially; 
{117 Lateral_surface_of_the_anterior_region_of_surangular_and_posterior_region_of_dentary_ without_a_longitudinal_depression with_a_longitudinal_depression; 
{118 Ventral_exposure_of_splenials_ absent present; 
{119 Tooth_margin_carinae_ without_carinae_or_with_smooth_or_crenulated_carinae with_homogeneous_denticulate_carinae_denticles_are_small_and_symmetrical_in_form_as_in_ziphodont_teeth; 
{120 Lateral_surface_of_anterior_process_of_jugal_ flat_or_convex with_broad_shelf_below_the_orbit_with_triangular_depression_underneath_it; 
{121 Jugal_extension_below_the_orbit_ does_not_exceed_the_anterior_margin_of_orbit exceeds_margin_of_orbit; 
{122 Notch_in_premaxilla_on_lateral_edge_of_external_nares_ absent; 
{123 Dorsal_border_of_external_nares_ formed_mostly_by_the_nasals formed_by_both_the_nasals_and_premaxilla; 
{124 Posterodorsal_process_of_premaxilla_ absent present_extending_posteriorly_wedging_between_maxilla_and_nasals; 
{125 Premaxilla_maxilla_suture_in_palatal_view_medial_to_alveolar_region_orientation_of_suture_ anteromedially_directed sinusoidal_posteromedially_directed_on_its_lateral_half_and_anteromedially_directed_along_its_medial_region posteromedially_directed straight posteromedially_curved_U_shaped_; 
{126 Nasal_lateral_border_posterior_to_external_nares_ laterally_concave straight; 
{127 Nasal_lateral_edges_ nearly_parallel oblique_to_each_other_converging_anteriorly oblique_to_each_other_diverging_anteriorly; 
{128 Palatine_anteromedial_margin_ exceeding_the_anterior_margin_of_the_palatal_fenestrae_extending_anteriorly_between_the_maxillae; 
{129 Dorsoventral_height_of_jugal_antorbital_region_with_respect_to_infraorbital_region equal_or_lower antorbital_region_more_expanded_than_infraorbital_region_of_jugal; 
{130 Maxilla_lacrimal_contact_ partially_included_in_antorbital_fossa completely_included; 
{131 Lateral_eustachian_tube_openings_location_ located_posteriorly_to_the_medial_opening aligned_anteroposteriorly_and_dorsoventrally; 
{132 Anterior_process_of_ectopterygoid_ developed reduced_absent; 
{133 Posterior_process_of_ectopterygoid_ developed reduced_absent; 
{134 Small_foramen_located_in_teh_premaxillo_maxillary_suture_in_lateral_surface_not_for_big_mandibular_teeth_ absent present; 
{135 Jugal_posterior_process_extent_of_process_ exceeding_posteriorly_the_infratemporal_fenestrae does_not_exceed_infratemporal_fenestrae; 
{136 Compressed_crown_of_maxillary_teeth_orientation_ oriented_paraleel_to_the_longitudinal_axis_of_skull; 
{137 Large_and_aligned_neurovascular_foramina_on_lateral_maxillary_surface_ absent present; 
{138 External_surface_of_maxilla_and_premaxilla_general_shape_ with_a_single_plane_facing_laterally with_ventral_region_facing_laterally_and_dorsal_region_facing_dorsolaterally; 
{139 Maxillary_teeth_lateral_compression_ absent present_compression_assymetrically_occuring_only_along_distal_margin_giving_teeth_a_teardrop_shape present_lateral_compression_symmetrically_developed; 
{140 Posteroventral_corner_of_quadratojugal_ reaches_the_quadrate_condyles does_not_reach_the_quadrate_condyles; 
{141 Base_of_postorbital_process_of_jugal_orientation_ directed_posterodorsally directed_dorsally directed_anterodorsally; 
{142 Postorbital_process_of_jugal_location_on_jugal_ anteriorly_placed in_the_middle posteriorly_places; 
{143 Postorbital_ectopterygoid_contact_ present absent; 
{144 Quadratojugal_ornamentation_ absent ornamented_on_the_base; 
{145 Prefrontal_maxillary_contact_in_the_inner_anteromedial_region_of_orbit absent present; 
{146 Basispenoid_exposure_on_braincase_ without_lateral_exposure with_lateral_exposure; 
{147 Quadrate_process_of_pterygoids_ well_developed; 
{148 Quadrate_major_axis_direction_of_orientation_ posteroventrally; 
{149 Quadrate_distal_end_ with_only_one_plane_facing_posteriorly with_two_distinct_faces_in_posterior_view_a_posterior_one_and_amedial_one_bearing_the_foramen_aereum; 
{150 Anteroposterior_development_of_neural_spine_in_axis_ well_developed_covering_all_the_neural_arch_length; 
{151 Prezygapophyses_of_axis_development_relative_to_neural_arch_ not_exceeding_edge_of_neural_arch exceeding_the_anterior_margin_of_neural_arch; 
{152 Postzygapophyses_of_axis_ well_developed_curved_laterally poorly_developed; 
{153 Shape_of_dentary_symphysis_in_ventral_view_ tapering_anteriorly_forming_an_angel U_shaped_smoothly_curving_anteriorly; 
{154 Unsculpted_region_in_the_dentary_below_the_tooth_row_ absent present; 
{155 Suranglur_contribution_to_the_glenoid_fossa_ forms_only_the_lateral_wall_of_glenoid forms_approximately_one_third_of_the_glenoid; 
{156 Femur_anterior_margin_ linear bears_flange_for_coccygeofemoralis_musculature; 
{157 Dentary_lateral_surface_ smooth_lateral_to_seventh_alveolous with_lateral_concavity_for_the_reception_of_the_enlarged_maxillary_tooth; 
{158 Dorsal_edge_of_dentary_ slightly_concave_or_straight_and_subparallel_to_the_longitudinal_axis_of_skull straight_with_an_abrupt_dorsal_expansion_being_straight_posteriorly with_a_single_dorsal_expansion_and_concave_posterior_to_this sinusoidal_with_two_concave_waves; 
{159 Dentary_compression_and_lateroventral_surface_anterior_to_mandibular_fenestra_ compressed_and_vertical not_compressed_and_convex; 
{160 Splenial_posterior_to_symphysis_ thin robust_dorsally; 
{161 Cheek_teeth_ not_constricted_at_base_of_crown constricted; 
{162 Ventral_edge_of_premaxilla_location_relative_to_maxilla_ at_the_same_height_as_the_ventral_edge_of_maxilla located_deeper_with_the_dorsal_contour_of_anterior_part_of_dentary_strongly_concave; 
{163 Maxillary_dental_implantion_ teeth_in_isolated_alveoli located_on_a_dental_groove; 
{164 Caudal_tip_of_nasals_ converge_at_sagittal_plane caudally_separated_by_anterior_sagittal_projection_of_frontals; 
{165 Relative_length_between_squamosal_and_postorbital_ squamosal_is_longer postorbital_is_longer; 
{166 Jugal_portion_of_postorbital_bar_relative_to_lateral_surface_of_jugal_ flush_with_lateral_surface anteriorly_continuous_but_posteriorly_inset medially_displaced_and_a_ridge_separate_postorbital_bar_from_lateral_surface_of_jugal; 
{167 Outer_surface_of_squamosal_laterodorsally_oriented_ extensive reduced_and_sculpted reduced_and_unsculpted; 
{168 Quadratojugal_spine_at_caudal_margin_of_infratemporal_fenestra_ absent present; 
{169 Quadrate_condyles_ poorly_developed_intercondylar_groove medial_condyle_expands_ventrally_being_separate_from_the_lateral_condyle_by_a_deep_intercondylar_groove; 
{170 Exposure_of_supraoccipital_in_skull_roof_ absent present; 
{171 Nasal_participation_in_antorbital_fenestra_ present absent; 
{172 Anterior_opening_of_temporo_orbital_canal_in_dorsal_ exposed hidden_in_dorsal_view_and_overlapped_by_squamosal_rim_of_supratemporal_fossa; 
{173 Foramen_intramandibularis_oralis_ small_or_absent; 
{174 Coronoid_size_ short_and_located_below_the_dorsal_edge_of_the_mandibular_ramus; 
{175 Width_of_root_of_teeth_with_respect_to_crown_ narrower_or_equal wider; 
{176 Gap_in_cervico_thoracic_dorsal_armor_ absent present; 
{177 Lateral_contour_of_snout_in_dorsal_view_ straight sinusoidal; 
{178 Pterygoidean_flanges_ laminar_and_expanded; 
{179 Ectopterygoid_medial_process_shape_ single_process; 
{180 Skull_roof_shape_in_dorsal_view_ rectangular trapezoidal; 
{181 Prefrontal_pillars_when_integrated_in_palate_ pillars_transversely_expanded transversely_expanded_in_their_dorsal_part_and_columar_ventrally longitudinally_expanded_in_their_dorsal_part_and_columnar_ventrally; 
{182 Ventral_edge_of_maxilla_in_lateral_view_ straight_or_convex sinusoidal; 
{183 Position_of_first_enlarged_maxillary_teeth_ second_or_third_alveoli fourth_or_fifth; 
{184 Splenial_dentary_suture_at_symphysis_on_ventral_surface_ v_shaped transversal; 
{185 Posterior_peg_at_symphysis_ absent present; 
{186 Posterior_ridge_on_glenoid_fossa_of_articular_ present absent; 
{187 Cusps_of_teeth_number_and_conformation_ one_unique_cusp one_main_cusp_with_smaller_cusps_arranged_in_one_row one_main_cusp_with_smaller_cusps_arranged_in_more_than_one_row several_cusps_of_equal_size_arranged_in_more_than_one_row; 
{188 Dorsal_surface_of_mandibular_symphysis_ flat_or_slightly_concave; 
{189 Medial_surface_of_splenials_posterior_to_symphysis_ flat_or_slightly_convex; 
{190 Choanal_septum_shape_ narrow_vertical_bony_sheet T_shaped_bar_expanded_ventrally; 
{191 Cross_section_of_distal_end_of_quadrate_ mediolaterally_wide_and_anteroposteriorly_thin subquadrangular; 
{192 Lateral_surface_of_dentaries_below_alveolar_margin_at_mid_to_posterior_region_of_tooth_row_ vertically_oriented_continuous_with_rest_of_lateral_surface_of_the_dentaries flat_surface_exposed_laterodorsally_divided_by_a_ridge_from_rest_of_the_lateral_surface_of_the_dentaries; 
{193 Palatine_pterygoid_contact_on_palate_ palatines_overlies_pterygoids palatines_firmly_sutured_to_pterygoids; 
{194 Ectopterygoid_main_axis_orientation_ laterally_or_slightly_anterolaterally anteriorly_subparallel_to_the_skull_longitudinal_axis; 
{195 Squamosal_descending_process_ absent present; 
{196 Development_of_distal_quadrate_body_ventral_to_otoccipital_quadrate_contact_ distinct incipiently_distinct indistinct; 
{197 Pterygoid_flanges_size_ thin_and_laminar dorsoventrally_thick_with_pneumatic_spaces; 
{198 Postorbital_participation_in_infratemporal_fenestra_ almost_or_entirely_excluded bordering_infratemporal_fenestra; 
{199 Palatines_contribution_to_suborbital_fenestra_ form_margin_of_suborbital_fenestra excluded_from_margin_of_suborbital_fenestra; 
{200 Angular_posterior_to_mandibular_fenestra_location_on_mandible_ widely_exposed_on_lateral_surface_of_mandible shifted_to_the_ventral_surface_of_mandible; 
{201 Posteroventral_edge_of_mandibular_ramus_shape_ straight_or_convex markedly_deflected; 
{202 Quadrate_ramus_of_pterygoid_width_in_ventral_view_ narrow broad; 
{203 Pterygoids_contact_on_palate_ not_in_contact_anterior_to_basisphenoid_on_palate pterygoids_in_contact; 
{204 Olecranon_ well_developed absent; 
{205 Cranial_table_width_with_respect_to_ventral_portion_of_skull_ as_wide_as_ventral_portion narrower_than_ventral_portion_of_skull; 
{206 Depression_on_posterolateral_surface_of_maxilla_ absent present; 
{207 Paired_anterior_palatal_fenestra_ absent present; 
{208 Paired_ridges_located_medially_on_ventral_surface_of_basisphenoid_ absent present; 
{209 Ventral_margin_of_infratemporal_bar_of_jugal_ straight dorsally_arched; 
{210 Posterolateral_end_of_quadratojugal_shape_and_relationship_with_quadrate_ acute_or_rounded_tightly_overlapping_the_quadrate with_sinusoidal_ventral_edge_and_wide_and_rounded_posterior_edge_slightly_overhanging_the_lateral_surface_of_the_quadrate; 
{211 Quadrate_body_distal_to_otoccipital_quadrate_orientation_of_contact_in_posterior_view_ ventrally_oriented ventrolaterally_oriented; 
{212 Wedge_like_process_of_the_maxilla_in_lateral_surface_of_premaxilla_maxilla_ absent; 
{213 Palpebrals_ separated_from_the_lateral_edge_of_the_frontal extensively_sutured_to_each_other_and_to_the_lateral_margin_of_the_frontals; 
{214 External_surface_of_ascending_process_of_jugal_ exposed_laterally exposed_posterolaterally; 
{215 Longitudinal_ridge_on_lateral_surface_of_jugal_below_infratemporal_fenestra_ absent present_running_entire_length_of_of_posterior_process_of_jugal present_running_entire_length_of_jugal; 
{216 Dorsal_surface_of_posterolateral_region_of_squamosal_ without_ridges with_three_curved_ridges_oriented_longitudinally; 
{217 Ridge_along_dorsal_section_of_quadrate_quadratojugal_contact_ absent present; 
{218 Sharp_ridge_on_the_surface_of_teh_angular_ absent present_on_the_ventral_most_margin present_along_the_lateral_surface; 
{219 Longitudinal_ridge_along_the_dorsolateral_surface_of_surangular_ absent present; 
{220 Dorsal_surface_of_osteoderms_ornamented_with_anterolaterally_and_anteromedially_directed_ridges_fleur_dy_lys_pattern_of_Osmolska_et_al._1997_ absent present; 
{221 Cervical_region_surrounded_by_lateral_and_ventral_osteoderms_sutured_to_the_dorsal_elements_ absent present; 
{222 Appendicular_osteoderms_ absent present; 
{223 Supratemporal_fenestra_ present absent; 
{224 Flate_ventral_surface_of_internal_nares_septum_ parallel_sided tapering_anteriorly; 
{225 Perinarial_fossa_ restricted_extension; 
{226 Premaxillary_palate_circular_paramedian_depressions_ absent present_located_anteriorly_on_the_premaxilla; 
{227 Nasals_shape_of_posterolateral_region_ flat_surface_facing_dorsally; 
{228 Lacrimal_posterior_extent_and_relationship_with_jugal_ extends_ventroposteriorly_widely_contacting_the_jugal tapers_ventroposteriorly_does_not_contact_or_contacts_the_jugal_only_slightly; 
{229 Jugal_large_foramen_on_the_lateral_surface_near_the_anterior_margin_ absent; 
{230 Procumbent_premaxillary_alveoli_ absent; 
{231 Palatines_orientation_ run_parasagittally_along_midline; 
{232 Ectopterygoid_participation_in_the_palatine_bar_ absent; 
{233 Choanal_opening_ opened_posteriorly_and_continuous_with_pterygoid_surface closed_posteriorly_by_an_elevated_wall_formed_by_the_pterygoids; 
{234 Ectopterygoid_extent_of_medial_projection_on_the_ventral_surface_of_pterygoid_flanges_ barely_extended widely_extended_covering_approximately_the_lateral_half_of_the_ventral_surface_of_the_pterygoid_flanges; 
{235 Evaginated_maxillary_alveolar_edges_ absent present_as_a_continuous_sheet present_as_discrete_evaginations_at_each_alveoli; 
{236 Premaxilla_foramen_in_perinarial_depression_ absent; 
{237 Frontal_anterior_ramus_with_respect_to_the_tip_of_the_prefrontal_ ending_posteriorly ending_anteriorly; 
{238 Premaxilla_anterior_alveolar_margin_orientation_ vertical inturned; 
{239 Premaxillary_tooth_row_orientation_ arched_posteriorly_from_midline angled_posterolaterally_at_120_degree_angle; 
{240 Last_premaxillary_tooth_position_relative_to_tooth_row_ anterior anterolateral; 
{241 Posterior_teeth_with_rings_of_undulated_enamel_ absent; 
{242 Maxilla_palatine_suture_shape_of_palatines_ palatine_anteriorly_rounded palatine_anteriorly_pointed palatine_invaginated; 
{243 Postorbital_bar_lateral_surface_formed_by_ postorbital_and_jugal; 
{244 Surangular_groove_enlarged_foramen_at_anterior_end_ absent; 
{245 Shape_of_antorbital_fossa_ subcircular_or_subtriangular elongated_low_and_oriented_obliquely; 
{246 Prefrontal_lateral_developent_ reduced; 
{247 Foramen_for_the_internal_carotid_artery_ reduced_similar_in_size_to_the_openings_of_cranial_nerves_IX_XI; 
{248 Squamosal_posterolateral_region_lateral_to_paroccipital_process_ narrow; 
{249 Posteromedial_branch_of_squamosal_orientation_ transversely_oriented posterolaterally_oriented; 
{250 Squamosal_dorsal_margin_of_occipital_flange_ straight; 
{251 Sculpture_in_external_surface_of_rostrum_ absent present; 
{252 Longitudinal_depressisons_on_palatal_surface_of_maxillae_and_palatines_ absent; 
{253 Angle_between_medial_and_anterior_margins_of_supratemporal_fossa_ approximately_90_degrees; 
{254 Sacral_vertebrae_direction_of_transverse_processes_ laterally; 
{255 Prefrontal_and_lacrimal_around_orbits_ forming_flat_rims evaginated_forming_elevated_rims; 
{256 Nasal_bones_ paired partially_or_completely_fused; 
{257 Axial_neural_spines_width_of_posterior_half_ wide narrow; 
{258 Axial_hyapophysis_deep_fork_ present absent; 
{259 Ulna_width_of_olecranon_process_ narrow_and_subangular wide_and_rounded; 
{260 M._teres_major_and_M._dorsalis_scapulae_insert_separately_on_humerus_ scars_can_be_distinguished_dorsal_to_deltopectoral_crest insert_with_common_tendon_single_insertion_scar; 
{261 Dentary_projection_of_anterior_alveoli_ anterodorsally weakly_procumbent strongly_procumbent; 
{262 Squamosal_dorsal_and_ventral_rims_of_squamosal_groove_for_external_ear_valve_musculature_ parallel or_squamosal_groove_flares_anteriorly; 
{263 Ectopterygoid_contact_with_maxilla_near_toothrow_ ectopterygoid_abuts_maxillary_toothrow maxilla_broadly_separates_ectopterygoid_from_maxillary_toothrow; 
{264 Shallow_fossa_at_anteromedial_corner_of_supratemporal_fenestra_ present absent_anteromedial_corner_of_supratemporal_fenestra_smooth; 
{265 Lateral_margins_of_the_frontal_relative_to_the_skull_surface_ flush_with_skkull_surface elevated_forming_ridged_orbital_margins; 
{266 Laterosphenoid_orientation_of_capitate_process_ laterally_oriented anteroposteriorly_oriented_toward_midline; 
{267 Exoccipital_development_of_boss_and_paroccipital_process_ boss_prominent_on_paroccipital_process_process_lateral_to_cranioquadrate_opening_short boss_small_or_absent_on_paroccipital_process_process_lateral_to_cranioquadrate_opening_long; 
{268 Ectopterygoid_extent_along_lateral_pterygoid_flange_at_maturity_ extends_to_posterior_tip_of_lateral_pterygoid_flange does_not_extend_to_posterior_tip_of_lateral_pterygoid; 
{269 Incisive_foramen_location_relative_to_premaxillary_toothrow_ foramen_situated_far_from_premaxillary_toothrow_at_the_level_of_the_second_or_third_alveolus abuts_premaxillary_toothrow projects_between_first_premaxillary_teeth; 
{270 Ventral_surface_of_choanal_septum_ smooth_to_slightly_depressed marked_by_a_acute_groove vomeral_septum_divided_by_into_bilateral_laminae; 
{271 Proximal_most_portion_of_fibular_head_ straight_sided_to_weakly_developed_posteriorly very_sharply_projecting_posteriorly_forming_distinct_extension; 
{272 Cervical_rib_shaft_posterior_process_posterodorsally_projecting_spine_at_the_junction_with_the_tubercular_process_ absent; 
{273 Longitudinal_keels_on_dorsal_surface_of_osteoderms_ restricted_to_the_posterior_edge_of_osteoderm not_restricted_to_the_posterior_edge; 
{274 Jugal_anteriorly_on_lateral_surface_below_orbits_ lacks_a_depression possesses_a_depression; 
{275 Transverse_ridge_crossing_the_frontal_anteromedial_to_the_orbits_ absent present_as_a_ridge present_as_prominent_anteriorly_curved_shelf_transverse_interorbital_crest_sensu_Andrade_and_Hornung_2011_; 
{276 Shallow_hemispherical_depression_on_the_lacrimal_and_or_prefrontal_anterior_to_the_orbital_margin_not_articulation_facet_for_palbebral_ absent present; 
{277 Anterior_half_of_interfenestral_bar_between_suborbital_fenestrae_ lateral_margins_are_parallel_to_subparallel flared_anteriorly; 
{278 Posterior_half_of_interfenestral_bar_between_suborbital_fenestrae_ lateral_margins_are_parallel_to_subparallel flared_posteriorly; 
{279 Angular_shape_of_posteroventral_margin_ straight_or_gently_arched_dorsally strongly_arched_dorsally; 
{280 Squamosal_lateral_margin_of_dorsal_surface_ squared_off_with_continuous_ear_valve_groove bears_a_prominent_depressed_area_just_anterior_to_the_posterior_lobe_of_the_squamosal_groove_for_ear_valve_discontinuous; 
{281 Fibula_shaft_distal_to_iliofibularis_trochanter_ straight bowed_posteriorly; 
{282 Scapular_blade_width_ no_more_than_twice_the_length_of_the_scapulocoracoid_articulation scapular_blade_very_broad_and_greater_than_twice_the_length_of_the_scapulocoracoid_articulation; 
{283 Vomer_exposure_on_palate_ exposed unexposed; 
{284 Supraoccipital_when_present_on_dorsal_skull_roof_ with_narrow_exposure_parietal_forms_portion_of_occipital_surface with_broad_exposure_parietal_does_not_form_portion_of_occipital_surface; 
{285 Jugal_anterior_and_posterior_processes_ inline_dorsoventrally; 
{286 Lateral_expansion_of_posterodorsal_edge_of_surangular_anterior_to_glenoid_fossa_ absent present; 
{287 In_lateral_view_anterior_process_of_the_squamosal_extending_to_the_orbital_margin_overlapping_the_postorbital_ absent present; 
{288 In_lateral_view_surangular_and_dentary_suture_ simple_with_little_or_no_interdigitating; 
{289 Prominent_depression_on_the_palate_near_alveolar_margin_at_the_level_of_the_6th_or_7th_alveoulus_ absent present; 
{290 Pterygoid_ventral_surface_of_pterygoid_flanges_parachoanal_fossae_ absent; 
{291 Pterygoid_in_ventral_view_participation_in_the_suborbital_fenestra_ pterygoid_forms_margin_of_suborbital_fenestra; 
{292 Maxilla_lateral_surface_along_alveolar_margin_conformation_of_the_neurovascular_foramina_ foramina_absent_or_form_a_single_continuous_row; 
{293 Surface_of_tooth_enamel_ smooth_or_slightly_crenulated; 
{294 Posterior_molariform_teeeth_wear_facets_ absent present; 
{295 Tooth_with_transitional_morphology_present_at_premax_max_contact absent; 
{296 Basiocciptal_midline_crest_on_basioccipital_plate_below_occipital_condyle absent present; 
{297 Dorsal_osteoderms_accessory_ranges_of_osteoderms_sensu_Frey_1988_ absent present; 
{298 Maxillary_tooth_size_relative_to_maxillary_palatal_surface_in_palatal_view proportionally_small_teeth_occupying_only_marginal_portion_of_ventral_surface_of_maxilla proportionally_well_developed_teeth_occupying_large_area_of_maxillary_palatal_surface; 
{299 Ventral_lamina_of_jugal extends_far_anterior_to_the_ectopterygoid ends_at_the_level_of_the_ectopterygoid; 
{300 Surangular_extension_toward_posterior_end_of_retroarticular_process along_entire_length pinched_off_anterior_to_posterior_tip; 
{301 Muscle_attachment_scars_on_ventral_surface_of_quadrate_ramus_ form_modest_crests prominent_knobs; 
{302 Pterygoid_flange_shape_ mediolaterally_broad_reaching_laterally_beyond_medial_margin_of_quadrate_condyles relatively_narrow_does_not_reacah_laterally_to_medial_margin_of_quadrate_condyles; 
{303 In_ventral_view_posterior_process_of_maxilla_relative_to_ITF excluded_from_ITF forms_part_of_ITF; 
{304 Highly_modified_ectopterygoid_mediolaterally_broad_and_flattened_with_greatly_expanded_ absent present_robust_anterior_process_larger_than_posterior_process present_anterior_and_posterior_process_roughly_equal_in_size; 
{305 In_ventral_view_palate_medial_to_toothrow_ forms_a_single_continuous_surface ridge_running_on_the_palate_medial_to_toothrow_formed_by_maxilla_and_ectopteryoig; 
{306 Maxillary_tooth_row_penultimate_and_ultimate_maxillary_teeth_enlargedand_highly_modified_crushing_tooth absent present; 
{307 Prefrontals do_not_meet_at_midline meet_at_midline; 
{308 Pear_shaped_external_naris absent present; 
{309 Skull_dorsal_surface_at_parietal_squamosal_contact surface_continuous_across_suture suture_marked_by_groove_or_sulcus; 
{310 Maxilla_lateral_suface_continuous_groove_or_sulcus_extening_from_orbital_margin_to_near_orbital_margin_towards_narial_opening absent present; 
{311 Maxilla_posteromedial_process_curving_posteriorly_onto_palatine_formed_nasopharyngeal_passage absent present; 
{312 Squamosal_posterior_half_dorsal_and_ventral_rims_of_groove_for_external_ear_valve_musculature_ thin_or_parallel_sided flared_posteriorly; 
{313 Lacrimal_in_dorsal_view_anterior_extent_on_rostrum_relative_to_prefrontal prefrontal_extends_farther_anteriorly lacrimal_extends_farther_anteriorly lacrimal_and_prefrontal_subequal_in_anterior_extent; 
{314 Lacrimal_in_dorsal_view_mediolateral_width_relative_to_prefrontal equal_to_or_less_than_width_of_prefrontal wider_than_prefrontal; 
{315 Incisive_foramen_size small moderate large; 
{316 Premaxillae_degree_of_contact_posterior_to_the_incisive_foramen extensive_contact narrow_contact; 
{317 Posterior_margin_of_the_palatines_where_they_form_the_floor_of_the_nasopharyngeal_passage_shape V_or_U_shaped straight; 
{318 Posterior_margin_of_the_choanal_groove_location anteriorly_on_the_pterygoids posteriorly_on_the_pterygoids_near_the_posterior_margin_of_pterygoids; 
{319 Pterygoid_palatine_contact_ventral_aspect_of_palate_shape_of_the_suture_ transverse_or_nearly_so prong_of_pterygoid_projects_anteriorly; 
{320 On_palate_foramen_located_on_premaxilla_maxilla_suture_near_the_alveolar_border absent present; 
{321 Ectopterygoid_pterygoid_contact_in_ventral_view complex_anterior_part_of_ectopterygoid_forming_suture_whereas_posterior_part_of_ectopterygoid_overlaps_the_pterygoid sutured_along_entire_contact_no_part_of_ectopterygoid_overlapping_pterygoid; 
{322 Palatines_mediolateral_width_anterior_to_the_suborbital_fenestrae wide narrow_constricted_between_the_palatal_processes_of_the_maxilla; 
{323 Ventral_tubercle_of_proatlas_width_relative_to_dorsal_crest; 
{324 Fused_proatlas_shape; 
{325 Proatlas_anterior_process; 
{326 Proatlas_dorsal_keel_size; 
{327 Atlas_intercentrum_shape_in_lateral_view_; 
{328 Atlantal_rib_shape_of_dorsal_margin; 
{329 Atlantal_rib_medial_laminae; 
{330 Atlantal_ribs_articular_facet; 
{331 Axila_rib_width_of_tuberculum; 
{332 Axial_rib_tuberculum_diapophysis_contact; 
{333 Axis_neural_spine_orientation_of_anterior_half; 
{334 Axis_neural_spine_shape; 
{335 Axis_neural_spine_posterior_half_shape; 
{336 Axis_neural_arch_lateral_process_diapophysis_; 
{337 Axis_location_of_hypapophysis; 
{338 Axis_hypapophysis_with_deep_fork; 
{339 Axis_hyapophyseal_keels_present_up_to; 
{340 Third_cervical_vertebra_first_postaxial_presence_of_prominent_hypapophysis; 
{341 Choana_at_maturity_projects; 
{342 posterior_margin_of_suborbital_process_of_ectopterygoid_in_ventral_view_straight_or_concave_convex; 
{343 large_laterally_displaced_and_adjoining_maxillary_and_dentary_alveoli_holding_double_caniniform_dentition_absent_present; 
{344 posterior_margin_of_the_pterygoid_wing_mediolaterally_oriented_or_posterolaterally_oriented_being_straight_or_concave; 
; 
Ancstates 
 -0      -1      -2      -3      -4      -5      -6      -7      -8      -9      
 -10     -11     -12     -13     -14     -15     -16     -17     -18     -19     
 -20     -21     -22     -23     -24     -25     -26     -27     -28     -29     
 -30     -31     -32     -33     -34     -35     -36     -37     -38     -39     
 -40     -41     -42     -43     -44     -45     -46     -47     -48     -49     
 -50     -51     -52     -53     -54     -55     -56     -57     -58     -59     
 -60     -61     -62     -63     -64     -65     -66     -67     -68     -69     
 -70     -71     -72     -73     -74     -75     -76     -77     -78     -79     
 -80     -81     -82     -83     -84     -85     -86     -87     -88     -89     
 -90     -91     -92     -93     -94     -95     -96     -97     -98     -99     
 -100    -101    -102    -103    -104    -105    -106    -107    -108    -109    
 -110    -111    -112    -113    -114    -115    -116    -117    -118    -119    
 -120    -121    -122    -123    -124    -125    -126    -127    -128    -129    
 -130    -131    -132    -133    -134    -135    -136    -137    -138    -139    
 -140    -141    -142    -143    -144    -145    -146    -147    -148    -149    
 -150    -151    -152    -153    -154    -155    -156    -157    -158    -159    
 -160    -161    -162    -163    -164    -165    -166    -167    -168    -169    
 -170    -171    -172    -173    -174    -175    -176    -177    -178    -179    
 -180    -181    -182    -183    -184    -185    -186    -187    -188    -189    
 -190    -191    -192    -193    -194    -195    -196    -197    -198    -199    
 -200    -201    -202    -203    -204    -205    -206    -207    -208    -209    
 -210    -211    -212    -213    -214    -215    -216    -217    -218    -219    
 -220    -221    -222    -223    -224    -225    -226    -227    -228    -229    
 -230    -231    -232    -233    -234    -235    -236    -237    -238    -239    
 -240    -241    -242    -243    -244    -245    -246    -247    -248    -249    
 -250    -251    -252    -253    -254    -255    -256    -257    -258    -259    
 -260    -261    -262    -263    -264    -265    -266    -267    -268    -269    
 -270    -271    -272    -273    -274    -275    -276    -277    -278    -279    
 -280    -281    -282    -283    -284    -285    -286    -287    -288    -289    
 -290    -291    -292    -293    -294    -295    -296    -297    -298    -299    
 -300    -301    -302    -303    -304    -305    -306    -307    -308    -309    
 -310    -311    -312    -313    -314    -315    -316    -317    -318    -319    
 -320    -321    -322    -323    -324    -325    -326    -327    -328    -329    
 -330    -331    -332    -333    -334    -335    -336    -337    -338    -339    
 -340    -341    -342    -343    -344   ; 
 
xgroup 
 
 
 
; 
agroup 
 
 
 
; 
taxcode  
+0      +1      +2      +3      +4      +5      +6      +7       
+8      +9      +10     +11     +12     +13     +18     +19      
+20     +21     +22     +23     +24     +25     +26     +27      
+28     +29     +30     +31     +32     +33     +34     +35      
+36     +37     +38     +39     +40     +41     +42     +43      
+44     +45     +46     +47     +48     +49     +50     +51      
+52     +53     +54     +55     +56     +57     +58     +59      
+60     +61     +62     +63      
; 
